# Supplementary material for: Construction of chlorogenic acid nanoparticles for effective alleviation of ulcerative colitis
Source: Royal Society of Chemistry journal article supplement (doi:10.1039/d4fo02122c), 2024-01-01
Supplement: d4fo02122c1.pdf [file d4fo02122c1.pdf]

## Supporting Information

### Construction of chlorogenic acid nanoparticles for effective alleviation of ulcerative colitis

Shumeng Hu <sup>a, b</sup>, Runan Zhao <sup>a, c</sup>, Tao Chen <sup>a, d</sup>, Xuesong Chi <sup>a, d</sup>, Yangjing Li <sup>a, d</sup>,

Di Wu <sup>a, d</sup>, Beiwei Zhu <sup>a, b, d\*</sup>, Jiangning Hu <sup>a, d\*</sup>

<sup>a</sup> *College of Food Science and Engineering, Jilin Agricultural University, Changchun, 130118, PR China*

<sup>b</sup> *State Key Laboratory of Marine Food Processing and Safety Control, National Engineering Research Center of Seafood, Dalian Polytechnic University, Dalian, 116034, PR China*

<sup>c</sup> *College of Biosystems Engineering and Food Science, Fuli Institute of Food Science, Zhejiang University, Hangzhou 310058, PR China*

<sup>d</sup> *School of Food Science and Technology, Collaborative Innovation Center of Seafood Deep Processing, Dalian Polytechnic University, Dalian, 116034, PR China*

\* Corresponding author.

Bei-wei Zhu, E-mail: zhubeiwei@163.com

Jiang-ning Hu, E-mail: hujiangning2005@hotmail.com

## Supporting Figures

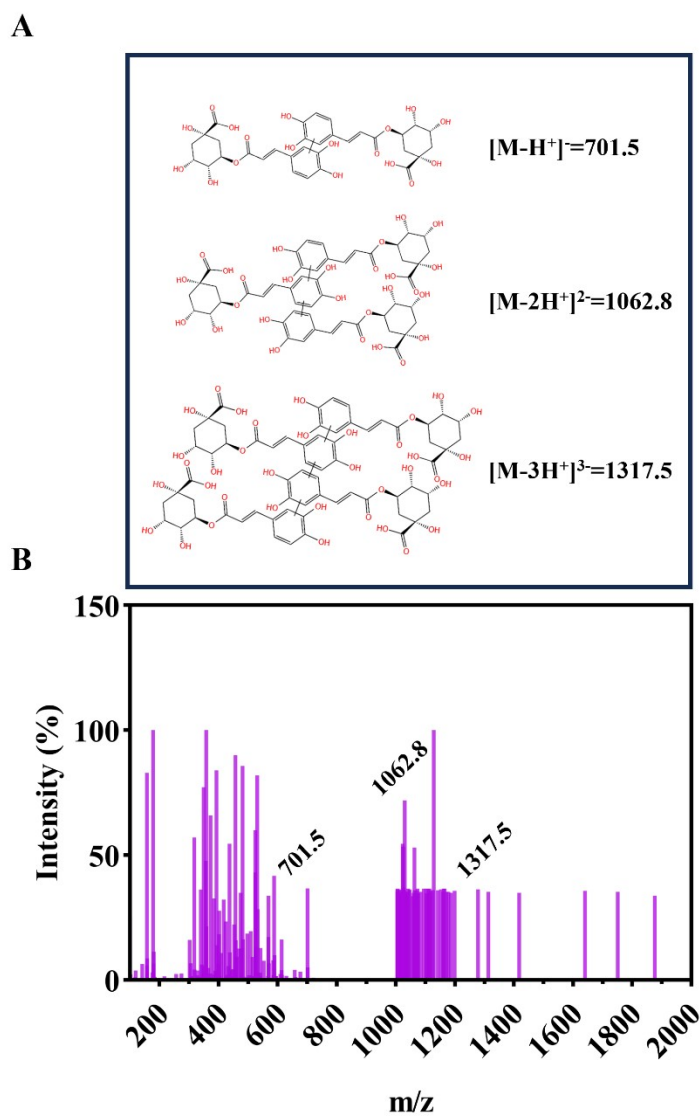

**Figure S1.** Prediction of CA NPs structure. (A-B) The ESI-MS spectrum and possible oligomers assigned to specific peaks.

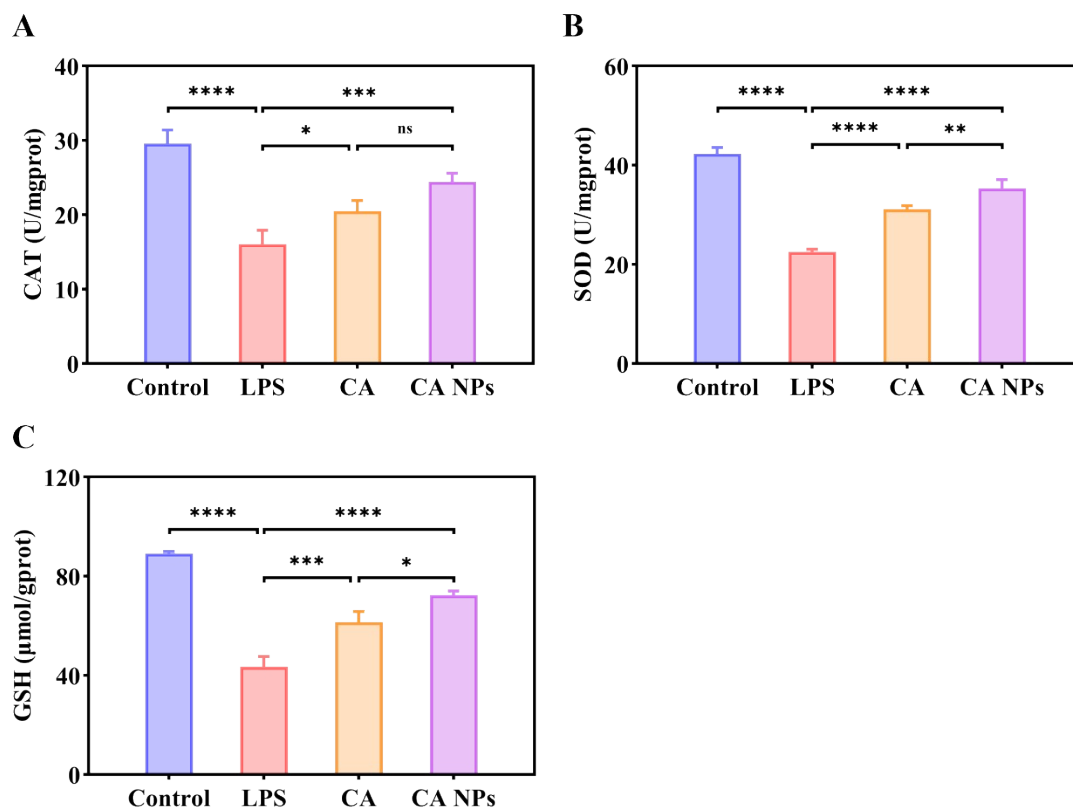

**Figure S2.** The levels of (A) CAT, (B) SOD, (C) GSH in Caco-2 cells treated with CA and CA NPs. Values are expressed as mean  $\pm$  SD (n=3). \*  $p < 0.05$ , \*\*  $p < 0.01$ , \*\*\*  $p < 0.001$ , \*\*\*\*  $p < 0.0001$ .

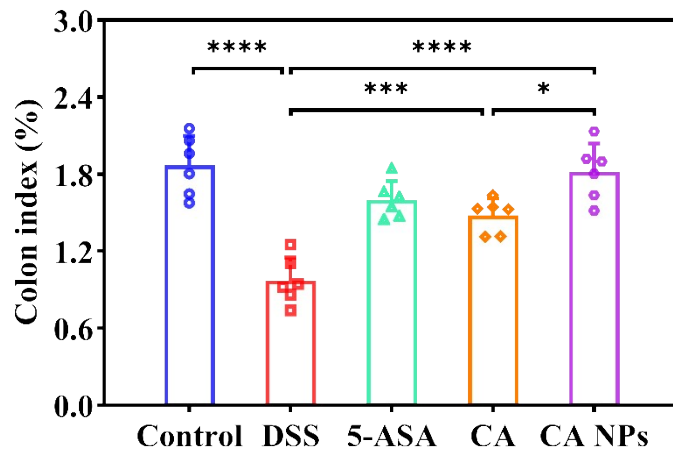

**Figure S3.** Colon index UC mice treated with different samples. Values are expressed as mean  $\pm$  SD (n=6). \*  $p < 0.05$ , \*\*  $p < 0.01$ , \*\*\*  $p < 0.001$ , \*\*\*\*  $p < 0.0001$ .

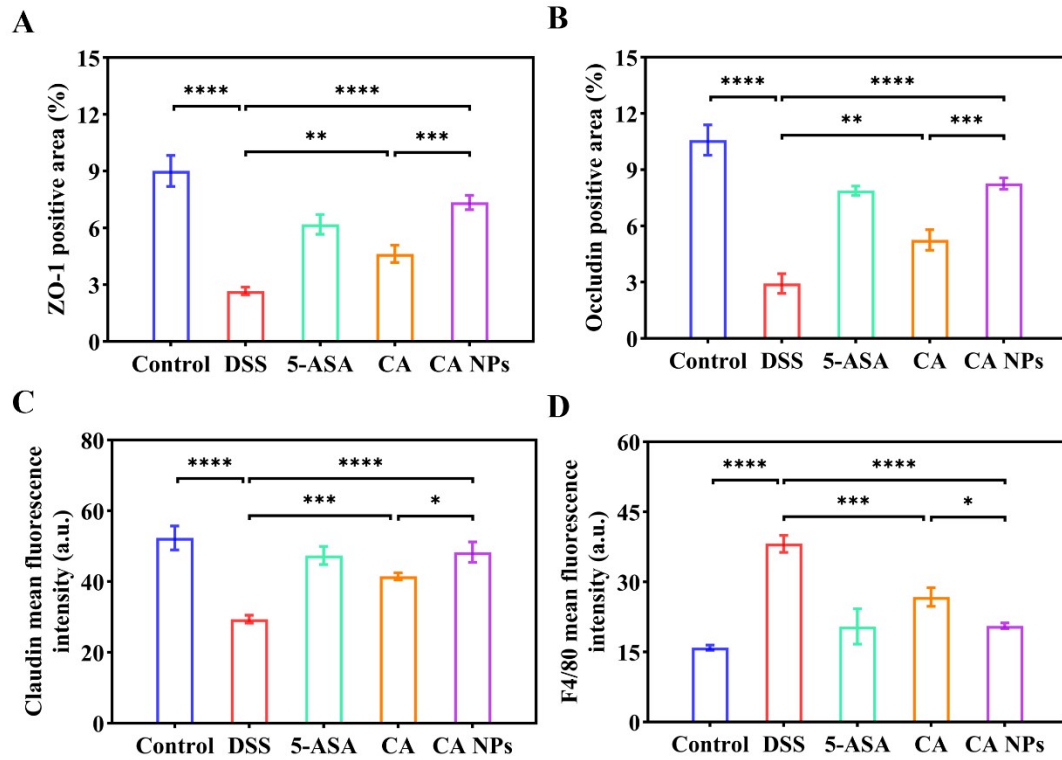

**Figure S4.** Expression level of (A) ZO-1 and (B) Occludin in colons after different treatments. Mean fluorescence intensity of (C) Claudin and (D) F4/80. Values are expressed as mean  $\pm$  SD (n=3). \*  $p < 0.05$ , \*\*  $p < 0.01$ , \*\*\*  $p < 0.001$ , \*\*\*\*  $p < 0.0001$ .

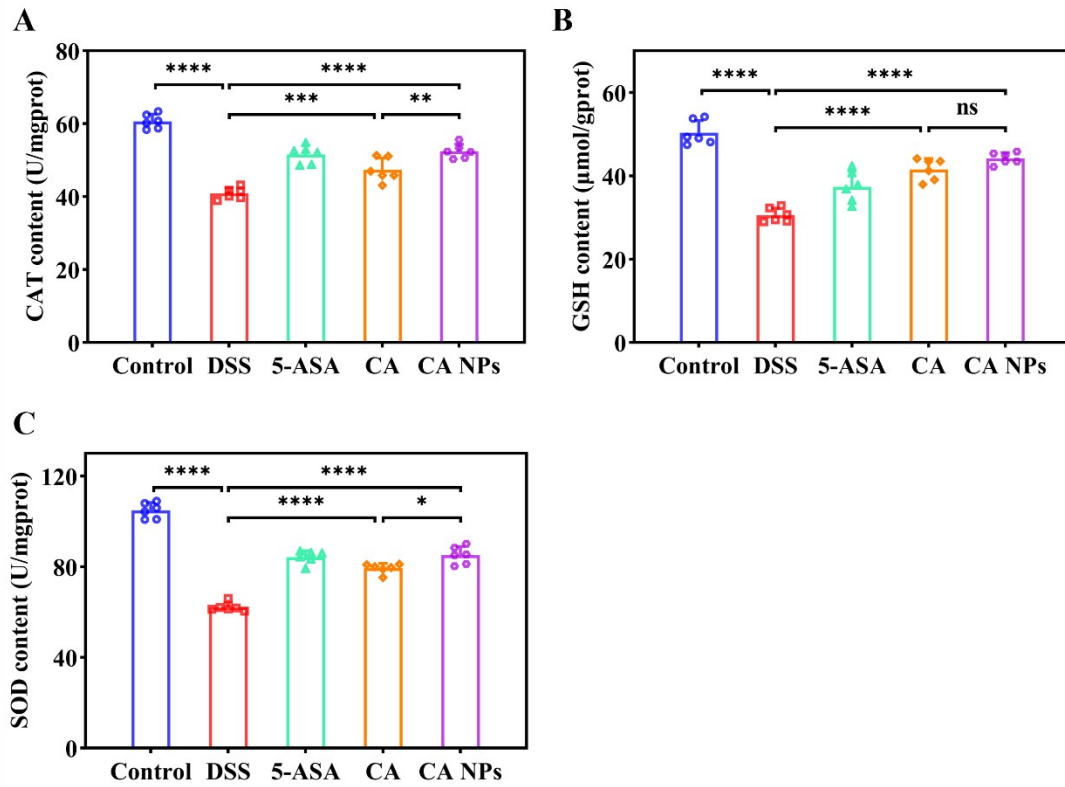

**Figure S5.** The content of (A) catalase (CAT), (B) glutathione (GSH), (C) superoxide dismutase (SOD) in colon tissue of colitis mice determined by the corresponding assay kits. Values are expressed as mean  $\pm$  SD (n=6). \*  $p < 0.05$ , \*\*  $p < 0.01$ , \*\*\*  $p < 0.001$ , \*\*\*\*  $p < 0.0001$ .

## Supporting Tables

**Table S1.** Experimental conditions and physical parameters of CA NPs-*i* (*i*=1-4)

fabrication. Scale bar: 100 nm.

| Sample number | CA (mg/mL) | HRP (mg/mL) | H <sub>2</sub> O <sub>2</sub> (mg/mL) | SEM                                                                                 | Size (nm)     | Zeta (mV)     |
|---------------|------------|-------------|---------------------------------------|-------------------------------------------------------------------------------------|---------------|---------------|
| CA NPs-1      | 1          | 0.025       | 0.095                                 | 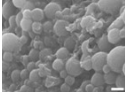  | 88.86 ± 9.59  | -31.49 ± 1.77 |
| CA NPs-2      | 1          | 0.050       | 0.190                                 |   | 106.65 ± 4.12 | -36.37 ± 1.23 |
| CA NPs-3      | 1          | 0.100       | 0.380                                 |   | 162.89 ± 9.78 | -33.55 ± 1.05 |
| CA NPs-4      | 1          | 0.200       | 0.760                                 |  | 217.41 ± 5.63 | -28.28 ± 0.95 |
